# Supplementary material for: PEG/3D graphene oxide network form-stable phase change materials with ultrahigh filler content
Source: Royal Society of Chemistry journal article supplement (doi:10.1039/c9ta07629h), 2019-01-01
Supplement: c9ta07629h1.pdf [file c9ta07629h1.pdf]

## *Supporting Information*

### **PEG/3D graphene oxide network form-stable phase change materials with ultrahigh filling content**

Jinjing Qiu,<sup>a</sup> Xiaoqiao Fan,<sup>a</sup> Yusheng Shi,<sup>a</sup> Shufen Zhang,<sup>a</sup> Xin Jin<sup>b</sup>, Wentao Wang<sup>c</sup>  
and Bingtao Tang<sup>\*a,b</sup>

*a State Key Laboratory of Fine Chemicals, Dalian University of Technology, Dalian 116024, PR China*

*b Eco-chemical Engineering Cooperative Innovation Center of Shandong, Qingdao University of Science &  
Technology, Qingdao 266042, PR China*

*c Key Laboratory of Advanced Textile Materials and Manufacturing Technology, Ministry of Education, Zhejiang  
Sci-Tech University, Hangzhou 310018, PR China*

Table S1. Components of PGCs.

| Sample | PEG content<br>(wt %) | Ca <sup>2+</sup> -GO content<br>(wt %) |
|--------|-----------------------|----------------------------------------|
| PGC0.5 | 99.5                  | 0.5                                    |
| PGC1.0 | 99.0                  | 1.0                                    |
| PGC2.0 | 98.0                  | 2.0                                    |
| PGC4.0 | 96.0                  | 4.0                                    |
| PGC6.0 | 94.0                  | 6.0                                    |

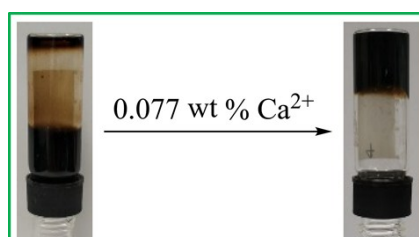

Fig. S1. Digital photographs of the reaction system for preparing GO gel before and after the Ca<sup>2+</sup> cross-linking.

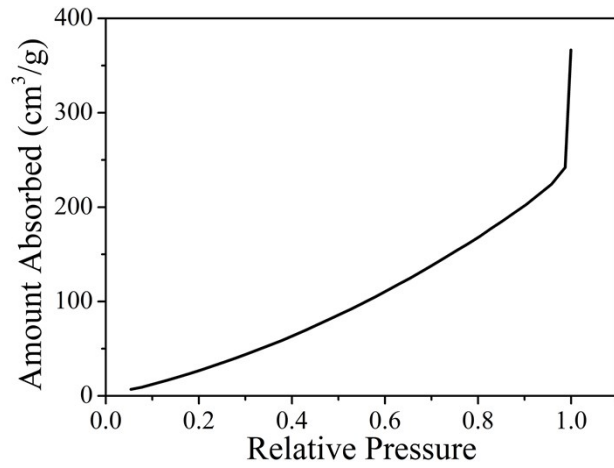

Fig. S2. Nitrogen sorption isotherm of GO aerogel cross-linked by  $\text{Ca}^{2+}$ .

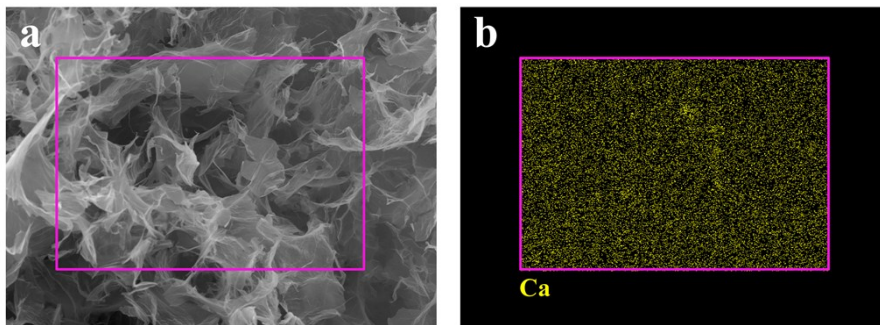

Fig. S3. EDS mapping of Ca on the surface of GO aerogel cross-linked by  $\text{Ca}^{2+}$ .

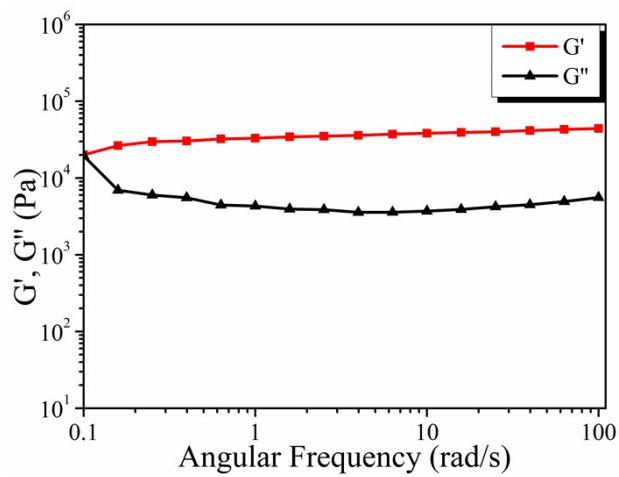

Fig. S4. Rheological property of the PGC1.0 gel.

Table S2. Phase change temperatures and enthalpies of PGCs.

| Sample  | Filling<br>(wt %) | T <sub>m</sub> (°C) | T <sub>f</sub> (°C) | Δ H <sub>m</sub><br>(J/g) | Δ H <sub>f</sub><br>(J/g) |
|---------|-------------------|---------------------|---------------------|---------------------------|---------------------------|
| PGC6.0  | 94.0              | 60.5                | 40.8                | 189.7                     | 178.2                     |
| PGC4.0  | 96.0              | 60.0                | 40.8                | 202.3                     | 195.2                     |
| PGC2.0  | 98.0              | 61.2                | 41.7                | 212.4                     | 207.2                     |
| PGC1.0  | 99.0              | 61.0                | 41.7                | 218.3                     | 212.0                     |
| PGC0.5  | 99.5              | 62.2                | 42.7                | 218.9                     | 213.2                     |
| PEG6000 | --                | 62.4                | 42.1                | 221.7                     | 217.8                     |

Table S3. Thermal conductivities of PGCs and corresponding increasing ratio relative to PEG6000.

| Sample         | Filling<br>(wt %) | Thermal conductivity<br>(W·m <sup>-1</sup> ·K <sup>-1</sup> ) | Increasing ratio for thermal<br>conductivity (%) |
|----------------|-------------------|---------------------------------------------------------------|--------------------------------------------------|
| PGC6.0         | 94.0              | 0.396                                                         | 87.7                                             |
| PGC4.0         | 96.0              | 0.393                                                         | 86.3                                             |
| PGC2.0         | 98.0              | 0.384                                                         | 82.0                                             |
| PGC1.0         | 99.0              | 0.363                                                         | 72.0                                             |
| PGC0.5         | 99.5              | 0.344                                                         | 63.0                                             |
| Control sample | 99.0              | 0.241                                                         | 14.2                                             |
| PEG6000        | 100.0             | 0.211                                                         | --                                               |

The leakage tests for the PGCs, pure PEG6000, and the control sample were conducted on a horizontal heating plate with a constant temperature for 20 min with varying temperatures, as shown in Fig. S5. The samples were prepared as 25 mm diameter disks with 5 mm thickness, and a digital camera was used to record the state of the samples. The control sample was produced by the direct mixing of a 99 wt % PEG6000 with GO (the control group in Fig. S5). The pure PEG6000 and the control sample started melting at 65 °C. However, the shapes of prepared PGCs were maintained without leakage at 65 °C, which is higher than the working temperature (the temperature range of phase transition is between 40.0 °C to 63.0 °C).

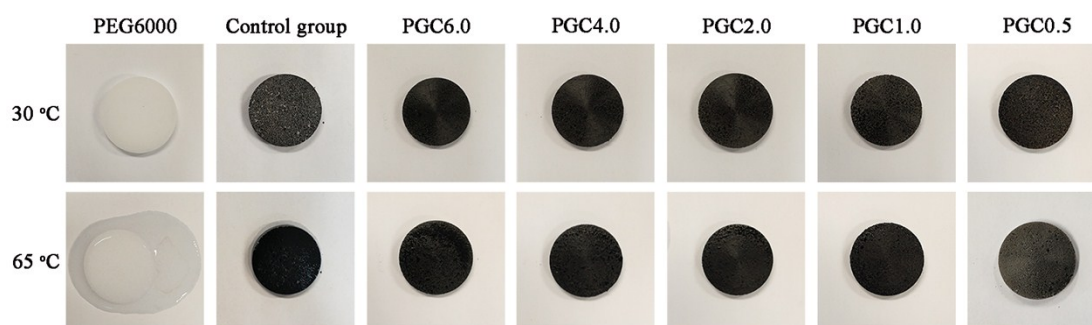

Fig. S5. Digital photographs for leakage test of the PGCs, PEG6000, and the control sample at different temperatures: 30 and 65 °C.

Table S4. Comparison of form-stable CPCMs prepared in this work and references.

| Form-stable PCM                               | Preparation method                     | Melting enthalpy (J/g) | The mass fraction of supporting material (wt %) | Reference |
|-----------------------------------------------|----------------------------------------|------------------------|-------------------------------------------------|-----------|
| PEG/GO/Boron nitride                          | Physical blending                      | 107.4                  | 34                                              | 1         |
| PEG/GO                                        | Physical blending                      | 142.8                  | 4                                               | 2         |
| PEG/3D porous carbon                          | Physical blending and impregnation     | 160.3                  | 15                                              | 3         |
| PEG/Carbon nanotubes/Metal-organic frameworks | Physical blending and impregnation     | 83.1                   | 30                                              | 4         |
| PEG/Mesoporous silica                         | Blending and impregnation              | 88.2                   | 30                                              | 5         |
| PEG/Graphene aerogel fiber                    | Impregnation                           | 124                    | 17                                              | 6         |
| PEG/GO/ Boron nitride                         | Vacuum Impregnation                    | 145.6                  | 19.0                                            | 7         |
| PEG/Diatomite/Ag                              | Vacuum Impregnation                    | 111.3                  | 37                                              | 8         |
| PEG/Ionic cross-linked GO                     | In situ filling by ionic cross-linking | 218.9                  | 0.5                                             | This work |

As shown in Table S4, in order to get stable shape, a large amount of supporting materials (higher than 4 wt %) is needed in physical blending or impregnation method reported by other references. Due to the influence of these supporting materials, the

melting enthalpies of the prepared CPCMs decrease below 160 J/g. Because of the excellent cross-linking ability of calcium ion, the 3D GO skeleton was rapidly formed to allow in situ filling more PEG in this study. The filling capacity reached to 99.5 wt %, and the melting enthalpy is 218.9 J/g, which is close enough to that of pure PEG. More importantly, the form-stable PGCs can be simply prepared through in situ filling by ionic cross-linking, which avoid re-impregnation.

Table S5. The thermal stability of the PGCs from TGA.

| Sample  | Filling (wt %) | 5% weight loss temperature (°C) | Fast weight loss temperature (°C) | Char yield at 800 °C (wt %) |
|---------|----------------|---------------------------------|-----------------------------------|-----------------------------|
| PGC6.0  | 94.0           | 355.4                           | 405.2                             | 5.8                         |
| PGC4.0  | 96.0           | 363.7                           | 408.1                             | 4.5                         |
| PGC2.0  | 98.0           | 366.2                           | 406.9                             | 2.0                         |
| PGC1.0  | 99.0           | 370.4                           | 407.8                             | 1.6                         |
| PGC0.5  | 99.5           | 371.5                           | 408.9                             | 1.4                         |
| PEG6000 | --             | 387.2                           | 414.2                             | 1.9                         |

## References

- 1 J. Yang, L. Tang, R. Bao, L. Bai, Z. Liu, B. Xie, M. Yang and W. Yang, *Sol. Energy Mater. Sol. Cells*, 2018, **174**, 56-64.
- 2 G. Qi, C. Liang, R. Bao, Z. Liu, W. Yang, B. Xie and M. Yang, *Sol. Energy Mater. Sol. Cells*, 2014, **123**, 171-177.
- 3 X. Chen, H. Gao, M. Yang, W. Dong, X. Huang, A. Li, C. Dong and G. Wang, *Nano Energy*, 2018, **49**, 86-94.
- 4 J. Wang, X. Huang, H. Gao, A. Li and C. Wang, *Chem. Eng. J.*, 2018, **350**, 164-172.
- 5 J. Wang, M. Yang, Y. Lu, Z. Jin, L. Tan, H. Gao, S. Fan, W. Dong and G. Wang, *Nano Energy*, 2016, **19**, 78-87.
- 6 G. Li, G. Hong, D. Dong, W. Song and X. Zhang, *Adv. Mater.*, 2018, **30**, 1801754.
- 7 J. Yang, L. Tang, R. Bao, L. Bai, Z. Liu, W. Yang, B. Xie and M. Yang, *J. Mater. Chem. A*, 2016, **4**, 18841-18851.
- 8 T. Qian, J. Li, X. Min, W. Guan, Y. Deng and L. Ning, *J. Mater. Chem. A*, 2015, **3**, 8526-8536.
